**Title: Lower Dynamic Cerebral Autoregulation following Acute Bout of Low-Volume High-Intensity Interval Exercise in Chronic Stroke Compared to Healthy Adults**

Alicen A. Whitaker<sup>1,2,3</sup>, Stacey E. Aaron<sup>4</sup>, Mark Chertoff<sup>5</sup>, Patrice Brassard<sup>6,7</sup>, Jake Buchanan<sup>1</sup>, Katherine Nguyen<sup>1</sup>, Eric D. Vidoni<sup>4,8</sup>, Saniya Waghmare<sup>1,4</sup>, Sarah M. Eickmeyer<sup>9</sup>, Sandra A. Billinger<sup>4,8,9,10</sup>

<sup>1</sup>Department of Physical Therapy, Rehabilitation Science, and Athletic Training, University of Kansas Medical Center, Kansas City, KS

<sup>2</sup>Department of Physical Medicine and Rehabilitation, Medical College of Wisconsin, Milwaukee, WI

<sup>3</sup>Cardiovascular Center, Medical College of Wisconsin, Milwaukee, WI

<sup>4</sup>Department of Neurology, University of Kansas Medical Center, Kansas City, KS

<sup>5</sup>Department of Hearing and Speech, University of Kansas Medical Center, Kansas City, KS

<sup>6</sup>Department of Kinesiology, Faculty of Medicine, Université Laval, Québec, Canada

<sup>7</sup>Research Center of the Institut Universitaire de Cardiologie et de Pneumologie de Québec-Université Laval, Québec, Canada

<sup>8</sup>University of Kansas Alzheimer's Disease Research Center, Fairway, KS

<sup>9</sup>Department of Physical Medicine and Rehabilitation, University of Kansas Medical Center, Kansas City, KS

<sup>10</sup>Department of Cell Biology and Physiology, University of Kansas Medical Center, Kansas City, KS

**Short Title: Post-Stroke dCA after HIIT**

**Corresponding Author:** Alicen A. Whitaker, DPT, PhD, (414) 955 - 1929,

8701 W Watertown Plank Rd, Milwaukee, WI 53226, [awhitakerhilbig@mcw.edu](mailto:awhitakerhilbig@mcw.edu)

1 **Abstract**

2 Fluctuating blood pressure during high-intensity interval exercise (HIIT) may challenge dynamic  
3 cerebral autoregulation (dCA), specifically post-stroke after an injury to the cerebrovasculature.  
4 We hypothesized dCA would be attenuated at rest and during a sit-to-stand, immediately  
5 following and 30 min after HIIT in individuals post-stroke compared to age- and sex-matched  
6 controls (CON). HIIT switched every minute between 70% and 10% estimated maximal watts  
7 for 10 min. Mean arterial pressure (MAP) and middle cerebral artery blood velocity (MCAv)  
8 were recorded. Resting dCA measured spontaneous fluctuations in MAP and MCAv via transfer  
9 function analysis. For sit-to-stand, time delay before an increase in cerebrovascular conductance  
10 index ( $CVCi = MCAv/MAP$ ), rate of regulation, and %change in MCAv and MAP were  
11 measured. Twenty-two individuals post-stroke (age  $60 \pm 12$  yrs,  $31 \pm 16$  months) and twenty-four  
12 CON (age  $60 \pm 13$  yrs) completed the study. VLF gain ( $p=0.02$ ,  $\eta^2=0.18$ ) and normalized gain  
13 ( $p=0.01$ ,  $\eta^2=0.43$ ) had a group-by-time interaction, with CON improving immediately and 30  
14 min after HIIT. Individuals post-stroke had impaired VLF phase ( $p=0.03$ ,  $\eta^2=0.22$ ) immediately  
15 following HIIT compared to CON. We found no differences in the sit-to-stand. Our study  
16 showed lower resting dCA up to 30 min after HIIT in individuals post-stroke compared to CON  
17 while the sit-to-stand response was maintained.

18 **Key Words:** Cerebral Autoregulation, Cerebral Blood Flow, Cerebral Hemodynamics,  
19 Rehabilitation, Physiotherapy

20

## 21 **Introduction**

22           Dynamic cerebral autoregulation (dCA), or the cerebral vasculature's ability to react to  
23 rapid changes in mean arterial pressure (MAP),<sup>1-3</sup> is impaired after stroke,<sup>4-8</sup> At rest, dCA can be  
24 quantified using transfer function analysis using spontaneous fluctuations in MAP and cerebral  
25 artery blood velocity, to obtain gain (amplitude of cerebral blood velocity change for a given  
26 oscillation in MAP) and phase (difference in the timing of the MAP and cerebral blood velocity  
27 waveforms) metrics. dCA also responds to changes in MAP during everyday activities, such as  
28 standing up from a seated position.<sup>3</sup> During a sit-to-stand, there is a transient drop in MAP, due  
29 to gravity and venous pooling. dCA then responds prior to the activation of the arterial baroreflex  
30 through an increase in cerebrovascular conductance index (CVCi).<sup>3</sup> However, the effects of  
31 aerobic exercise on the dCA response in individuals post-stroke with impaired dCA are  
32 unknown.<sup>9</sup>

33           It is important to examine the ability of the cerebrovascular system to react to changes in  
34 MAP after aerobic exercise,<sup>10, 11</sup> as dCA post-stroke may be less effective at buffering  
35 fluctuations in MAP, potentially leaving the brain less protected.<sup>12</sup> In individuals with a pre-  
36 existing injury to the cerebrovascular system such as stroke, the dCA response should be an  
37 important factor in prescribing aerobic exercise and determining post-exercise recovery care.<sup>12</sup>  
38 Specifically, one type of aerobic exercise, which may influence dCA and has gained in  
39 popularity for individuals post-stroke, is high-intensity interval exercise (HIIT).<sup>13-15</sup>

40           HIIT may challenge dCA due to the rapid fluctuations in MAP when switching between  
41 high-intensity exercise and recovery.<sup>10, 11, 16</sup> Despite multiple narrative reviews suggesting HIIT  
42 may attenuate dCA to a larger degree in individuals with a cerebrovascular injury such as stroke  
43 compared to healthy adults,<sup>10-12</sup> HIIT is starting to be implemented within stroke rehabilitation to

44 improve motor outcomes.<sup>13, 15, 17</sup> Therefore, we need to fill the gaps in knowledge on the effects  
45 of low-volume HIIT on cerebrovascular health and the dCA response in individuals with chronic  
46 stroke, specifically after exercise.<sup>12</sup>

47 While no studies have examined dCA after an acute bout of HIIT in individuals post-  
48 stroke,<sup>9</sup> prior work in healthy adults reported dCA was less effective during repeated squat-  
49 stands following HIIT.<sup>18</sup> During exercise recovery following HIIT, MAP decreases<sup>16, 19</sup> which  
50 could challenge the dCA response, as dCA seems less effective at buffering decreases compared  
51 to increases in MAP at rest.<sup>20</sup> During recovery following moderate to vigorous intensity  
52 continuous exercise in healthy adults, dCA at rest has been shown to be effected immediately  
53 following exercise and recover by 30 min.<sup>21, 22</sup> However, the dCA response may take longer than  
54 30 min to recover in individuals post-stroke potentially due to post-exercise hypotension and  
55 prolonged recovery of MAP.<sup>12</sup> Recovery of end tidal carbon dioxide ( $P_{ET}CO_2$ ) may also  
56 influence cerebral blood velocity following HIIT<sup>23</sup> in individuals post-stroke compared to  
57 healthy adults<sup>19</sup> and could also play a role in the dCA response during recovery.<sup>16, 24, 25</sup>

58 To address these critical gaps in knowledge, we characterized the dCA response using  
59 spontaneous fluctuations in MAP and middle cerebral artery blood velocity (MCAv) as well as  
60 during a single sit-to-stand following an acute bout of low-volume HIIT in individuals with  
61 chronic stroke compared to age- and sex-matched adult controls (CON). We hypothesized that  
62 individuals with chronic stroke would have attenuated dCA initially following HIIT as well as  
63 during a follow-up at 30 min after HIIT, compared to CON. We also hypothesized that  $P_{ET}CO_2$   
64 during recovery following HIIT would influence the dCA response.

## 65 **Material and Methods**

66 The University of Kansas Medical Center Human Subjects Committee approved all study  
67 procedures and the Declaration of Helsinki and local statutory requirements were followed. This  
68 study was registered on [clinicaltrials.gov](https://clinicaltrials.gov) (NCT04673994) and STROBE guidelines reported.

69 Our methods have been described previously.<sup>16, 19</sup> Individuals with stroke were included  
70 within this study if they were: 1) between 40-85 years old, 2) treated for stroke 6 months to 5  
71 years ago, 3) classified as inactive by performing <150 min of moderate intensity exercise per  
72 week, and 4) able to answer consenting questions and follow a 2-step command. Individuals  
73 within the CON group were matched to the sex and age  $\pm$  5 years of an individual post-stroke  
74 and also classified as inactive. Individuals were excluded from the study if: 1) stroke etiology  
75 was due to COVID-19, 2) they were unable to stand from a chair without physical assistance  
76 from another person, 3) they were unable to perform exercise on a recumbent stepper, 4)  
77 diagnosed with insulin-dependent diabetes, 5) diagnosed with another neurological disease, or 6)  
78 we were unable to find a transcranial Doppler ultrasound (TCD) signal on left or right side.

#### 79 *Study Visit 1*

80 All participants were informed of study procedures, benefits, and risks before providing  
81 voluntary written consent. We then collected participant demographics, current medications,  
82 prior medical history, and self-reported disability via the modified Rankin scale (mRS).<sup>26</sup> Lower  
83 extremity function in individuals post-stroke was assessed using the Fugl Meyer Lower  
84 Extremity Subscale and the 5 Times Sit-to-Stand Assessment.<sup>27, 28</sup> We then screened for an  
85 MCAv signal on both the left and right side using TCD probes (2-MHz, Multigon Industries Inc,  
86 Yonkers, New York). TCD signal acquisition was performed following standard depth, gain, and  
87 power.<sup>29</sup> The position of the probes were recorded on *study visit 1* to ensure accurate signal  
88 acquisition on *study visit 2* when recordings were performed.

89 Submaximal Exercise Test

90 As previously reported,<sup>16, 19</sup> the total body recumbent stepper (TBRS, T5XR NuStep, Inc.  
91 Ann Arbor, MI) submaximal exercise test was used to determine the estimated maximal watts  
92 (estimatedWatt<sub>max</sub>) for the acute HIIT bout.<sup>30, 31</sup> If individuals were on a beta blocker medication,  
93 maximum HR was determined using the beta-blocker equation ( $164 - (0.7 * \text{age})$ ).

94 Exercise Familiarization

95 The low-volume HIIT exercise familiarization was performed at least 15 min after the  
96 TBRS submaximal exercise test or once HR and MAP returned to near baseline values. Based on  
97 previously published low-volume HIIT protocols in older adults and clinical populations, low-  
98 volume HIIT was dosed at 70% estimatedWatt<sub>max</sub> and active recovery at 10%  
99 estimatedWatt<sub>max</sub>.<sup>15, 32-37</sup> Participants practiced switching between high-intensity exercise and  
100 active recovery bouts every min for approximately 10 min.

101 *Study Visit 2*

102 Following our laboratory protocols, the room was dimly lit and kept at a constant  
103 temperature (21 - 23°C).<sup>16, 38</sup> All participants were asked to refrain from caffeine for 8 hours,<sup>39</sup>  
104 food for 2 hours,<sup>40</sup> vigorous exercise for 24 hours,<sup>18</sup> and alcohol for 24 hours.<sup>41</sup>

105 Equipment Set-Up

106 Participants were seated on a recumbent stepper and fitted with the following equipment:  
107 1) bilateral TCD probes were secured to an adjustable headset to ensure a stable position and  
108 angle to measure MCAv throughout testing, 2) a 5-lead electrocardiogram (ECG; Cardiocard,  
109 Nasiff Associates, Central Square, New York) to collect HR, 3) a left middle finger Finometer  
110 cuff (Finapres Medical Systems, Amsterdam, the Netherlands) to measure beat-to-beat MAP, 4)  
111 a right arm brachial automated sphygmomanometer with a microphone (Tango M2; Suntech,

112 Morrisville, NC) for calibration of the Finometer, and 5) a nasal cannula attached to a  
113 capnograph (BCI Capnocheck Sleep 9004 Smiths Medical, Dublin, Ohio) for  $P_{ET}CO_2$   
114 monitoring. In individuals post-stroke with left arm spasticity, the Finometer was placed on the  
115 right arm.

### 116 Cerebral Autoregulation Measures

117 To quantify spontaneous dCA metrics, participants performed a 5-min seated rest  
118 recording 1) at BL, 2) immediately following HIIT and 3) 30 min after HIIT while capturing  
119  $MCA_v$ , MAP, HR, and  $P_{ET}CO_2$  (**Figure 1**).

120 Using a sit-to-stand procedure, we recorded  $MCA_v$ , MAP, HR, and  $P_{ET}CO_2$  and  
121 quantified dCA, based on our previously published methodology, 1) at BL, 2) following 5 min of  
122 passive recovery after HIIT, and 3) 35 min after HIIT.<sup>42</sup> Participants placed the hand with the  
123 Finometer across their chest and a sling was used to secure the arm at heart-level during the sit-  
124 to-stand recording.<sup>42</sup> Participants placed their feet flat on the ground, sat in an upright posture,  
125 and had a force-sensitive resistor (SEN-09376, Mouser Electronics Inc., Tx) to detect the exact  
126 moment of stance from the chair or the moment of arise-and-off (AO).<sup>42</sup> The sit-to-stand  
127 recording lasted a total of 3 minutes (see Figure 1). Individuals began in a seated position for 1  
128 min and then were given a 3-s countdown and asked to quickly transition to standing at 60-s and  
129 remained standing for 2 min for hemodynamic stability. Study personnel were standing next to  
130 the participants during the sit-to-stand transition. Initial orthostatic hypotension (within 15 s of  
131 standing) was determined by a drop of systolic blood pressure >40 mmHg and a drop in diastolic  
132 blood pressure >20 mmHg as well as symptoms of dizziness, blurry vision, nausea, or weakness  
133 with standing.<sup>43-45</sup>

### 134 Low-Volume HIIT Protocol

135 Repetitive 1-min intervals of high-intensity exercise (70% estimated  $\text{Watt}_{\max}$ ) separated  
136 by 1-min active recovery bouts (10% estimated  $\text{Watt}_{\max}$ ) were performed for 10 min.<sup>16, 19</sup> The  
137 first minute of HIIT was an active recovery bout, to avoid a Valsalva Maneuver, which would  
138 cause a transient decrease in MCAv.<sup>46</sup> Following HIIT, resistance and step rate were decreased  
139 for a 2-min cool-down.

#### 140 Data Acquisition

141 Data was collected at 500 Hz via an analog-to-digital unit (NI-USB-6212, National  
142 Instruments) and custom-written code within MATLAB (v2014a, TheMathworks Inc, Natick,  
143 Massachusetts).<sup>38</sup> Beat-to-beat data was processed offline using the QRS complex of the ECG.<sup>38</sup>  
144 The left MCAv signals for CON was used for analysis. However, if left MCAv was not  
145 obtainable or had noise, the right MCAv signal was used.<sup>38</sup> In individuals post-stroke, the  
146 ipsilesional hemisphere's MCAv signal was used to compare to CON.

#### 147 Transfer Function Analysis

148 Quantification of spontaneous TFA metrics followed the recommendations of the  
149 Cerebrovascular Research Network (CARNet).<sup>47, 48</sup> The 5-min seated rest recordings were  
150 computed to cross spectral analysis via fast Fourier transform utilizing Welch's method, 100-s  
151 Hanning windows, and 50% superposition. Waveforms of MAP and MCAv were analyzed via  
152 TFA and described through gain (amplitude), phase (shift in radians), and coherence  
153 (association). Due to dCA acting as a high-pass filter, measures of gain, phase, coherence, and  
154 power spectral density (PSD) of the integrate area were reported within very low frequency (0.02  
155 – 0.07 Hz) and low frequency (0.07 – 0.2Hz) bands. Following CARNet recommendations, the  
156 critical threshold of coherence was set at 0.34.<sup>47</sup> Coherence determined whether estimates of gain  
157 and phase were reliable and could be compared across time.<sup>47</sup> We visually inspected our data for



158 phase wrap-around and if detected these data points were removed.<sup>47</sup> Attenuated dCA was  
159 interpreted as higher gain (greater differences in amplitude) and lower phase (smaller shift)  
160 following HIIT compared to baseline.

### 161 Sit-to-Stand Analysis

162 Metrics of dCA included the time delay (TD) before the onset of the regulatory response,  
163 rate of regulation (ROR), percent change in MCAv ( $\% \Delta \text{MCAv}$ ), percent change in MAP  
164 ( $\% \Delta \text{MAP}$ ), and the ratio of  $\% \Delta \text{MCAv} / \% \Delta \text{MAP}$ . To measure the TD before the onset of the  
165 regulatory response, beat-to-beat CVCi was calculated ( $\text{CVCi} = \text{MCAv} / \text{MAP}$ ). Based on  
166 previously published methods,<sup>2, 42</sup> 2 trained researchers selected the physiological heart beat  
167 when CVCi began to increase (without immediate transient reduction).<sup>2</sup> The TD before the onset  
168 of the regulatory response was calculated as the time in s from AO until the continuous increase  
169 in CVCi. The ROR was used to determine the efficiency of the regulatory response, by  
170 calculating the slope of the 3 heart-beats following TD ( $\text{ROR} = \Delta \text{CVCi} / \Delta t / \Delta \text{MAP}$ ).<sup>2</sup> The ROR is  
171 taken within phase 1 of the sit-to-stand response (1-7 s after standing), prior to the onset of the  
172 arterial baroreflex response.<sup>3, 43</sup> The  $\% \Delta \text{MCAv}$  and  $\% \Delta \text{MAP}$  were calculated from the seated  
173 baseline (15 s prior to AO) to nadir (the lowest value of MCAv and MAP after standing).

$$174 \quad \% \Delta = ((\text{seated baseline} - \text{nadir}) / \text{seated baseline}) * 100$$

175 An attenuated dCA response was interpreted as a longer TD before the onset of the regulatory  
176 response and smaller ROR, greater  $\% \Delta \text{MCAv}$  and a higher ratio of  $\% \Delta \text{MCAv} / \% \Delta \text{MAP}$ .<sup>2, 43</sup>

### 177 Statistical Analysis

178 A Shapiro-Wilk test was used to verify the assumptions of normality and a priori  $\alpha$  was  
179 set at 0.05. Participant characteristics were compared using an independent t-tests for continuous  
180 variables or the Mann-Whitney U tests for non-normally distributed continuous variables.

181 Categorical variables were compared using a Chi-square. Baseline differences between groups  
182 were compared using an independent t-tests. The primary aim of this study was to examine dCA  
183 during spontaneous fluctuations at rest and during a sit-to-stand: 1) at BL, 2) following HIIT, and  
184 3) at a follow up 30 min after HIIT in individuals post-stroke compared to CON. Mixed-model  
185 ANOVAs were used to determine group, time, and group by time interaction effects. Post-hoc  
186 comparisons used one-sided t-tests. As a sensitivity analysis, we controlled for  $P_{ET}CO_2$  after  
187 HIIT within the mixed model ANOVAs.

## 188 **Results**

189 Sixty individuals were enrolled within the study. Forty-six individuals were included in  
190 the primary analysis: individuals post-stroke (n = 22) and CON (n = 24), shown in **Figure 2**.

191 Participant characteristics are described in **Table 1** and have been published in part  
192 within our previous work.<sup>16, 19</sup> Briefly, individuals post-stroke had a significantly slower 5x sit-  
193 to-stand, lower average workload at high-intensity, and lower workload during active recovery  
194 compared to CON. Individuals post-stroke had slight-to-moderate disability as shown by the  
195 mRS and lower extremity Fugl-Meyer sub score.<sup>49</sup>

### 196 Dynamic Cerebral Autoregulation during Spontaneous Fluctuations in MAP and MCAv

197 Twenty-two individuals had complete TFA data sets across all 3 timepoints, shown in  
198 **Table 2**. The reduction in TFA sample size is common and occurs due to reduced coherence  
199 within the VLF range,<sup>47</sup> which could be attributed to non-linearity.<sup>50</sup> At BL, there was no  
200 significant differences between groups in all measures. MAP PSD and MCAv PSD within the  
201 VLF and LF range were also not different between groups or across time.

202 Our primary analysis showed a significant group by time cross-over interaction effect for  
203 VLF gain ( $\eta^2 = 0.18$ ) and VLF normalized gain ( $\eta^2 = 0.43$ ), with the CON group having

204 decreased VLF gain and normalized gain immediately following HIIT and 30 min after HIIT  
205 compared to BL. While average VLF gain and normalized gain in individuals post-stroke  
206 changed in the opposite direction of CON following HIIT, creating a cross-over interaction, there  
207 was no significant within-group differences across time. There was also a significant group effect  
208 for VLF phase ( $\eta^2 = 0.22$ ), with individuals post-stroke having lower VLF phase compared to  
209 CON immediately following HIIT ( $p = 0.01$ ), and returned to being not significantly different  
210 between groups at 30 min after HIIT. Finally, there was a linear time effect for LF normalized  
211 gain, where CON individuals had reduced normalized gain at 30 min following HIIT compared  
212 to BL ( $p = 0.03$ ).

213 Our sensitivity analysis showed that when controlling for reductions in  $P_{ET}CO_2$  after  
214 HIIT, the group by time interaction remained for VLF gain ( $p = 0.01$ ) and VLF normalized gain  
215 ( $p = 0.004$ ). The group effect for VLF phase ( $p = 0.046$ ) also remained when controlling for  
216  $P_{ET}CO_2$ . However, the time effect for LF normalized gain ( $p = 0.56$ ) was no longer significant  
217 when controlling for  $P_{ET}CO_2$ . The transfer function analysis across the frequency ranges (0.02 –  
218 5 Hz) in individuals with chronic stroke compared to CON are shown in **Figure 3**.

#### 219 Sit-to-Stand Measures of Dynamic Cerebral Autoregulation

220 There were no significant group or time effects on the sit-to-stand measures of dCA  
221 following HIIT in individuals post-stroke compared to CON, shown in **Table 3**. When  
222 controlling for seated  $P_{ET}CO_2$  after HIIT, there were still no group or time effects for TD onset,  
223 ROR,  $\% \Delta MCA_v$ ,  $\% \Delta MAP$ , or  $\% \Delta MCA_v / \% \Delta MAP$ .

224 **Figure 4** shows the CVCi response during the sit-to-stand at BL in individuals post-  
225 stroke compared to CON. Monitoring of beat-to-beat MAP during the sit-to-stand allows for the  
226 detection of initial orthostatic hypotension, defined by the literature as a decrease in systolic

227 blood pressure >40 mmHg and/or diastolic blood pressure >20mmHg within 15 s after standing  
228 as well as symptoms of dizziness or syncope.<sup>45</sup> These values differ from the clinical thresholds of  
229 delayed orthostatic hypotension (systolic >20mmHg and/or diastolic >10mmHg) taken after 3-  
230 min of standing.<sup>51</sup> We report that no individuals met the criteria of initial orthostatic hypotension  
231 (having both decreases in blood pressure and symptoms of cerebral hypoperfusion)<sup>45</sup> during our  
232 study. However, following HIIT, three CON individuals met the criteria for initial drops in blood  
233 pressure upon standing but reported no symptoms of dizziness. At 35-min after HIIT, 2 different  
234 CON individuals met the criteria for an initial drop in blood pressure upon standing. While no  
235 individuals post-stroke met the blood pressure thresholds of drops of >40mmHg systolic or  
236 diastolic >20mmHg upon standing, one individual post-stroke reported slight dizziness upon  
237 standing at baseline (lasting < 3 s) and another individual post-stroke reported slight dizziness  
238 upon standing (lasting <3 s) following HIIT.

## 239 **Discussion**

240 Our findings collectively show that while dCA was not different at baseline between  
241 individuals with chronic stroke and their age- and sex-matched peers, dCA was lower during  
242 spontaneous fluctuations in MAP and MCAv immediately following HIIT. While various  
243 reviews have outlined the importance of examining the dCA response to HIIT in individuals  
244 post-stroke,<sup>10-12</sup> our study is the first to show: 1) individuals post-stroke had lower VLF phase  
245 immediately following HIIT compared to CON, and 2) VLF gain and normalized gain had a  
246 cross-over interaction effect in which CON individuals had a significant decrease in gain  
247 immediately following HIIT and 30 min after HIIT compared to BL while TFA gain in  
248 individuals post-stroke increased. Reductions in  $P_{ET}CO_2$  following HIIT only accounted for the  
249 significant difference in LF normalized gain. Interestingly, while dCA was lower following HIIT

250 during spontaneous MAP and MCAv fluctuations, our study did not find differences in the sit-to-  
251 stand dCA response between individuals post-stroke and CON, even when controlling for  
252  $P_{ET}CO_2$ . Therefore, dCA in individuals post-stroke may maintain the ability to respond to a  
253 single drop in MAP upon standing, after 6 min of seated rest recovery following HIIT.

#### 254 Spontaneous Dynamic Cerebral Autoregulation

255 While previous systematic reviews have reported impaired resting dCA in individuals  
256 post-stroke compared to controls,<sup>52</sup> our results did not show a difference between groups at  
257 baseline. Most of the previous studies reporting impaired dCA in individuals post-stroke were  
258 conducted during the acute stage (1-7 days post) and subacute stage (7 days – 6 months) post-  
259 stroke.<sup>53-55</sup> To our knowledge, only 1 other study has examined dCA in the chronic stage ( $\geq 6$   
260 months) post-stroke and reported decreased resting phase (within 0.06 – 0.12 Hz) at exactly 6-  
261 months post-stroke compared to healthy controls.<sup>56</sup> However, our study found no difference in  
262 resting BL dCA between individuals  $31 \pm 16$  months post-stroke and their age- and sex-matched  
263 peers. This could be due to differences in supine vs. seated rest recordings, TFA frequency  
264 ranges utilized, or the chronicity of stroke. It is possible that dCA at rest during spontaneous  
265 blood pressure oscillations may continue to recover within the chronic stage post-stroke.<sup>52</sup>

266 To show differences in dCA between individuals with chronic stroke and healthy adults,  
267 the cerebrovascular system may need to be hemodynamically challenged, such as with an acute  
268 bout of HIIT. We show that immediately following HIIT, dCA during spontaneous MAP and  
269 MCAv fluctuations was lower in individuals post-stroke compared to CON, with lower VLF  
270 phase and increased VLF gain and normalized gain. Lower VLF phase immediately following  
271 HIIT in individuals post-stroke compared to CON can be interpreted as dCA being less efficient  
272 at buffering the cerebrovascular system from changes in peripheral blood pressure.<sup>57</sup> The cross-

273 over interaction in VLF gain and normalized gain shows that while CON individuals had  
274 significant improvements in the ability of the cerebrovasculature to dampen the amplitude  
275 changes in MAP fluctuations<sup>57</sup> immediately following HIIT and 30 min after HIIT, individuals  
276 post-stroke had a reduction in the cerebral vessels' dampening ability. Even when controlling for  
277 changes in  $P_{ET}CO_2$ , the differences in dCA between groups during recovery were maintained  
278 within the VLF range.

279 Lower dCA in individuals post-stroke, quantified via TFA immediately following HIIT,  
280 could be due to dCA's sensitivity to decreasing MAP.<sup>19, 58, 59</sup> Previous studies have shown that  
281 dCA at rest<sup>20</sup> and during repetitive squat-stands<sup>58-60</sup> was less efficient at regulating decreases in  
282 MAP in comparison with MAP increases, and HIIT may exacerbate this directional sensitivity in  
283 healthy adults.<sup>61</sup> It is unknown whether individuals post-stroke have lesser dCA sensitivity to  
284 decreasing MAP compared to CON, however, this could potentially explain the differences  
285 between groups found immediately following HIIT. However, when forcing blood pressure to  
286 decrease using a single sit-to-stand following HIIT, we did not find any differences in the  
287 cerebral pressure-flow relationship in individuals post-stroke. Previous studies have also shown  
288 that blood pressure medications such as beta-blockers and calcium channel blockers may  
289 attenuate dCA.<sup>62-65</sup> Our study reports individuals post-stroke had greater beta-blocker use and  
290 trended toward greater calcium channel blocker use compared to CON. While we did not directly  
291 measure the effects of blood pressure medications on dCA, they could have also contributed to  
292 the lower dCA response in individuals post-stroke following HIIT.

### 293 Sit-to-Stand Dynamic Cerebral Autoregulation Response

294 There were no differences between individuals post-stroke and CON in the sit-to-stand  
295 dCA response at BL and after HIIT. We did not find a significant change in the TD before the

296 onset of dCA or the ROR response in individual post-stroke following HIIT compared to CON.  
297 Therefore, the temporal response of increasing CVCi during a sit-to-stand was maintained  
298 following HIIT in individuals post-stroke. A previous study in healthy adults has shown that the  
299 initial dCA response during a sit-to-stand (occurring  $2 \pm 2$  heartbeats after standing) may be due  
300 in-large to compliance of the cerebrovasculature, which occurs prior to cerebral vasodilation  
301 (occurring  $11 \pm 3$  heartbeats after standing).<sup>66</sup> While not measured within the study,  
302 cerebrovascular compliance may play a role in the preserved dCA sit-to-stand response  
303 following HIIT in individuals post-stroke and aging adults. We also did not show a significant  
304 difference in  $\% \Delta MCA_v / \% \Delta MAP$  following HIIT. These findings may suggest that the  
305 cerebrovascular system in individuals post-stroke did not become more pressure passive  
306 following HIIT, and changes in MAP when standing up from a seated position resulted in similar  
307 concordant changes in  $MCA_v$ .<sup>67</sup> However, when interpreting the dCA sit-to-stand findings, one  
308 must also take into account that the participants had a notable amount of seated recovery (~6  
309 min) before the dCA sit-to-stand measure. Therefore, future studies should examine the sit-to-  
310 stand response immediately following aerobic exercise, without seated rest, to determine stability  
311 of the dCA response and how long someone should wait before standing up.

### 312 Clinical Importance

313 Within the clinic, traditionally only peripheral blood pressure is used to determine  
314 hemodynamic stability during exercise recovery. However, our study shows the need to also  
315 examine the cerebrovascular system in individuals post-stroke. While the clinical implications  
316 for a lower dCA response during passive recovery immediately following HIIT are unknown,  
317 clinicians may want to continue practicing the recommended post-exercise precautions within  
318 the first 5 minutes following HIIT.<sup>12</sup> When waiting  $\geq 6$  min after HIIT to stand up from the

319 seated position, individuals post-stroke did not differ in the dCA response compared to BL or  
320 CON. However, two individuals post-stroke did report slight dizziness upon standing, despite not  
321 meeting the peripheral blood pressure criteria for initial orthostatic hypotension. Symptomatic  
322 thresholds associated with drops in MCAv during sit-to-stands following exercise should be  
323 established<sup>68</sup> in individuals post-stroke to better understand the cerebrovascular response rather  
324 than making inferences of “hypoperfusion” from peripheral blood pressure.

### 325 Methodological Considerations

326 The results of this study cannot be generalized to the entire population of individuals  
327 post-stroke, such as individuals with more severe impairments. Our findings within the chronic  
328 stage of stroke also cannot be generalized to individuals within the acute and subacute stages,  
329 where dCA has been shown to be impaired at baseline.<sup>52</sup> While TCD is currently the best method  
330 to capture beat-to-beat MCAv for TFA, one must assume a constant MCA diameter. While we  
331 could not directly measure MCA diameter during the study, a previous study using 4D Flow  
332 Magnetic Resonance Imaging in older adults showed no significant change in diameter during an  
333 8-mmHg change in  $P_{ET}CO_2$ .<sup>69</sup> Our sample size to quantify TFA metrics was also reduced due to  
334 low coherence, potentially due to non-linearity of spontaneous fluctuations.<sup>50</sup> Although we  
335 followed the CARNet recommendation of a 5-min recording,<sup>47</sup> to increase coherence via non-  
336 linear modeling requires longer recordings (~40 minutes).<sup>50</sup> Measuring the dCA response via a  
337 single sit-to-stand was chosen due to its real-life applicability as well as accounting for  
338 neuromuscular fatigue after HIIT in individuals post-stroke. While our sit-to-stand methodology  
339 accounted for the exact time in which individuals stood from the chair by using a force sensor,  
340 we did not use an accelerometer to account for the speed of standing. During the sit-to-stand, we  
341 were also unable to account for other potential confounding factors including neurovascular



342 coupling, sympathetic activity, and cardiac output. Since accumulating evidence also suggests  
343 directional sensitivity of the cerebral pressure-flow relationships,<sup>20, 58-61, 70, 71</sup> further research  
344 quantifying dCA while considering the direction of MAP changes will be necessary to better  
345 understand whether the reported attenuated dCA after HIIT is in response to reductions in MAP,  
346 increases in MAP, or both.

### 347 **Conclusion**

348 We show that dCA at rest during spontaneous fluctuations in MAP and MCAv was lower  
349 following HIIT in individuals post-stroke compared to CON. However, the dCA response during  
350 a sit-to-stand following HIIT (after ~6 min seated rest) did not show a significant difference  
351 compared to CON. These findings provide the groundwork for further characterization of the  
352 dCA response following aerobic exercise of varying intensities in individuals across the stages of  
353 stroke recovery. The cerebral autoregulation response to aerobic exercise and recovery is “an  
354 essential physiological consideration to protect the brain when progressing exercise intensity  
355 [post-stroke]”.<sup>12</sup> Future research should develop therapeutic strategies to improve dCA post-  
356 exercise in individuals post-stroke.

357

### 358 **Acknowledgements**

359 Thank you, Andrew Geise, Kailee Carter, Katelyn Struckle, and Emily Hazen for data collection.

360

### 361 **Author Contribution Statement**

362 AW, MC, EV, SE, and SB, conceived and designed research; AW, SA, JB, KN, and SW,  
363 performed experiments; AW, analyzed data; AW, SA, MC, PB, EV, and SB interpreted results of  
364 experiments; AW, PB, SB drafted manuscript; AW, SA, JB, KN, MC, PB, EV, SW, SE, and SB

365 edited and revised manuscript; AW, SA, JB, KN, MC, PB, EV, SW, SE, and SB approved final  
366 version of manuscript.

367

### 368 **Funding**

369 AW was supported by the National Heart, Lung and Blood Institute [T32HL134643],  
370 Cardiovascular Center's A.O. Smith Fellowship Scholars Program, Eunice Kennedy Shriver  
371 National Institute of Child Health and Human Development [T32HD057850], American Heart  
372 Association [898190], and Kansas Partners in Progress Inc. SEA was supported by National  
373 Center for Advancing Translational Sciences [TL1TR002368]. SB and EV were supported in  
374 part by the National Institute on Aging [P30 AG072973]. REDCap at University of Kansas  
375 Medical Center was supported by National Center for Research Resources [ULTR000001]. The  
376 REACH laboratory was supported by Georgia Holland Endowment. The content is solely the  
377 responsibility of the authors and does not necessarily represent the official views of the NIH.

378

### 379 **Declaration of Conflicting Interests**

380 Author(s) report no conflict of interest.

381

## 382 References

- 383 1. Fantini S, Sassaroli A, Tgavalekos KT, et al. Cerebral blood flow and autoregulation: current  
384 measurement techniques and prospects for noninvasive optical methods. *Neurophotonics* 2016; 3:  
385 031411. 2016/07/13. DOI: 10.1117/1.NPh.3.3.031411.
- 386 2. Labrecque L, Rahimaly K, Imhoff S, et al. Diminished dynamic cerebral autoregulatory capacity  
387 with forced oscillations in mean arterial pressure with elevated cardiorespiratory fitness. *Physiol Rep*  
388 2017; 5 2017/11/11. DOI: 10.14814/phy2.13486.
- 389 3. Sorond FA, Serrador JM, Jones RN, et al. The sit-to-stand technique for the measurement of  
390 dynamic cerebral autoregulation. *Ultrasound Med Biol* 2009; 35: 21-29. 2008/10/07. DOI:  
391 10.1016/j.ultrasmedbio.2008.08.001.
- 392 4. Petersen NH, Ortega-Gutierrez S, Reccius A, et al. Dynamic cerebral autoregulation is transiently  
393 impaired for one week after large-vessel acute ischemic stroke. *Cerebrovascular diseases (Basel,*  
394 *Switzerland)* 2015; 39: 144-150. 2015/02/11. DOI: 10.1159/000368595.
- 395 5. Xiong L, Tian G, Lin W, et al. Is Dynamic Cerebral Autoregulation Bilaterally Impaired after  
396 Unilateral Acute Ischemic Stroke? *Journal of stroke and cerebrovascular diseases : the official journal of*  
397 *National Stroke Association* 2017; 26: 1081-1087. 2017/03/07. DOI:  
398 10.1016/j.jstrokecerebrovasdis.2016.12.024.
- 399 6. Eames PJ, Blake MJ, Dawson SL, et al. Dynamic cerebral autoregulation and beat to beat blood  
400 pressure control are impaired in acute ischaemic stroke. *J Neurol Neurosurg Psychiatry* 2002; 72: 467-  
401 472. 2002/03/23. DOI: 10.1136/jnnp.72.4.467.
- 402 7. Sheriff F, Castro P, Kozberg M, et al. Dynamic Cerebral Autoregulation Post Endovascular  
403 Thrombectomy in Acute Ischemic Stroke. *Brain sciences* 2020; 10 2020/09/20. DOI:  
404 10.3390/brainsci10090641.
- 405 8. Aries MJ, Elting JW, De Keyser J, et al. Cerebral autoregulation in stroke: a review of transcranial  
406 Doppler studies. *Stroke* 2010; 41: 2697-2704. 2010/10/12. DOI: 10.1161/STROKEAHA.110.594168.
- 407 9. Moncion K, Allison EY, Al-Khazraji BK, et al. What are the effects of acute exercise and exercise  
408 training on cerebrovascular hemodynamics following stroke? A systematic review and meta-analysis. *J*  
409 *Appl Physiol (1985)* 2022; 132: 1379-1393. 2022/04/29. DOI: 10.1152/jappphysiol.00872.2021.
- 410 10. Calverley TA, Ogoh S, Marley CJ, et al. HIITing the brain with exercise: mechanisms,  
411 consequences and practical recommendations. *J Physiol* 2020 2020/04/30. DOI: 10.1113/JP275021.
- 412 11. Lucas SJ, Cotter JD, Brassard P, et al. High-intensity interval exercise and cerebrovascular health:  
413 curiosity, cause, and consequence. *J Cereb Blood Flow Metab* 2015; 35: 902-911. 2015/04/03. DOI:  
414 10.1038/jcbfm.2015.49.
- 415 12. Marzolini S, Robertson AD, Oh P, et al. Aerobic Training and Mobilization Early Post-stroke:  
416 Cautions and Considerations. *Front Neurol* 2019; 10: 1187. 2019/12/06. DOI: 10.3389/fneur.2019.01187.
- 417 13. Boyne P, Billinger SA, Reisman DS, et al. A Multicenter Randomized Comparison of High-Intensity  
418 Interval Training and Moderate-Intensity Exercise to Recover Walking Post-Stroke: Results of the HIT-  
419 Stroke Trial. *medRxiv* 2022: 2022.2008.2001.22278246. DOI: 10.1101/2022.08.01.22278246.
- 420 14. Hornby TG, Reisman DS, Ward IG, et al. Clinical Practice Guideline to Improve Locomotor  
421 Function Following Chronic Stroke, Incomplete Spinal Cord Injury, and Brain Injury. *J Neurol Phys Ther*  
422 2020; 44: 49-100. 2019/12/14. DOI: 10.1097/NPT.0000000000000303.
- 423 15. Crozier J, Roig M, Eng JJ, et al. High-Intensity Interval Training After Stroke: An Opportunity to  
424 Promote Functional Recovery, Cardiovascular Health, and Neuroplasticity. *Neurorehabil Neural Repair*  
425 2018; 32: 543-556. 2018/04/21. DOI: 10.1177/1545968318766663.

- 426 16. Whitaker AA, Aaron SE, Kaufman CS, et al. Cerebrovascular response to an acute bout of low-  
427 volume high-intensity interval exercise and recovery in young healthy adults. *J Appl Physiol (1985)* 2022;  
428 132: 236-246. 2021/12/10. DOI: 10.1152/jappphysiol.00484.2021.
- 429 17. Hornby TG, Reisman DS, Ward IG, et al. Clinical Practice Guideline to Improve Locomotor  
430 Function Following Chronic Stroke, Incomplete Spinal Cord Injury, and Brain Injury. *J Neurol Phys Ther*  
431 2020; 44: 49-100. 2019/12/14. DOI: 10.1097/NPT.0000000000000303.
- 432 18. Burma JS, Copeland P, Macaulay A, et al. Dynamic cerebral autoregulation across the cardiac  
433 cycle during 8 hr of recovery from acute exercise. *Physiol Rep* 2020; 8: e14367. 2020/03/13. DOI:  
434 10.14814/phy2.14367.
- 435 19. Whitaker AA, Waghmare S, Montgomery RN, et al. Reduced Middle Cerebral Artery Blood  
436 Velocity Response during Low-Volume High-Intensity Interval Exercise in Chronic Stroke. *medRxiv* 2022:  
437 2022.2012.2015.22283530. DOI: 10.1101/2022.12.15.22283530.
- 438 20. Panerai RB, Barnes SC, Batterham AP, et al. Directional sensitivity of dynamic cerebral  
439 autoregulation during spontaneous fluctuations in arterial blood pressure at rest. *J Cereb Blood Flow*  
440 *Metab* 2022: 271678x221142527. 2022/11/25. DOI: 10.1177/0271678x221142527.
- 441 21. Ogoh S, Fisher JP, Purkayastha S, et al. Regulation of middle cerebral artery blood velocity during  
442 recovery from dynamic exercise in humans. *Journal of Applied Physiology* 2007; 102: 713-721. DOI:  
443 10.1152/jappphysiol.00801.2006.
- 444 22. Willie CK, Ainslie PN, Taylor CE, et al. Maintained cerebrovascular function during post-exercise  
445 hypotension. *European Journal of Applied Physiology* 2013; 113: 1597-1604. DOI: 10.1007/s00421-012-  
446 2578-3.
- 447 23. Burma JS, Macaulay A, Copeland P, et al. Comparison of cerebrovascular reactivity recovery  
448 following high-intensity interval training and moderate-intensity continuous training. *Physiol Rep* 2020;  
449 8: e14467. 2020/06/09. DOI: 10.14814/phy2.14467.
- 450 24. Curtelin D, Morales-Alamo D, Torres-Peralta R, et al. Cerebral blood flow, frontal lobe  
451 oxygenation and intra-arterial blood pressure during sprint exercise in normoxia and severe acute  
452 hypoxia in humans. *J Cereb Blood Flow Metab* 2018; 38: 136-150. 2017/02/12. DOI:  
453 10.1177/0271678X17691986.
- 454 25. Labrecque L, Drapeau A, Rahimaly K, et al. Comparable blood velocity changes in middle and  
455 posterior cerebral arteries during and following acute high-intensity exercise in young fit women. *Physiol*  
456 *Rep* 2020; 8: e14430. 2020/04/29. DOI: 10.14814/phy2.14430.
- 457 26. Jurca R, Jackson AS, LaMonte MJ, et al. Assessing cardiorespiratory fitness without performing  
458 exercise testing. *Am J Prev Med* 2005; 29: 185-193. 2005/09/20. DOI: 10.1016/j.amepre.2005.06.004.
- 459 27. Park EY and Choi YI. Psychometric Properties of the Lower Extremity Subscale of the Fugl-Myer  
460 Assessment for Community-dwelling Hemiplegic Stroke Patients. *J Phys Ther Sci* 2014; 26: 1775-1777.  
461 2014/12/02. DOI: 10.1589/jpts.26.1775.
- 462 28. Mong Y, Teo TW and Ng SS. 5-repetition sit-to-stand test in subjects with chronic stroke:  
463 reliability and validity. *Arch Phys Med Rehabil* 2010; 91: 407-413. 2010/03/20. DOI:  
464 10.1016/j.apmr.2009.10.030.
- 465 29. Alexandrov AV, Sloan MA, Wong LK, et al. Practice standards for transcranial Doppler  
466 ultrasound: part I--test performance. *J Neuroimaging* 2007; 17: 11-18. 2007/01/24. DOI: 10.1111/j.1552-  
467 6569.2006.00088.x.
- 468 30. Wilson DR, Mattlage AE, Seier NM, et al. Recumbent Stepper Submaximal Test response is  
469 reliable in adults with and without stroke. *PLoS One* 2017; 12: e0172294. 2017/02/17. DOI:  
470 10.1371/journal.pone.0172294.
- 471 31. Billinger SA, VanSwearingen E, McClain M, et al. Recumbent stepper submaximal exercise test to  
472 predict peak oxygen uptake. *Med Sci Sports Exerc* 2012; 44: 1539-1544. 2012/03/03. DOI:  
473 10.1249/MSS.0b013e31824f5be4.

- 474 32. Boyne P, Dunning K, Carl D, et al. High-Intensity Interval Training and Moderate-Intensity  
475 Continuous Training in Ambulatory Chronic Stroke: Feasibility Study. *Phys Ther* 2016; 96: 1533-1544.  
476 2016/04/23. DOI: 10.2522/ptj.20150277.
- 477 33. Currie KD, Dubberley JB, McKelvie RS, et al. Low-volume, high-intensity interval training in  
478 patients with CAD. *Med Sci Sports Exerc* 2013; 45: 1436-1442. 2013/03/09. DOI:  
479 10.1249/MSS.0b013e31828bbbd4.
- 480 34. Nepveu JF, Thiel A, Tang A, et al. A Single Bout of High-Intensity Interval Training Improves  
481 Motor Skill Retention in Individuals With Stroke. *Neurorehabil Neural Repair* 2017; 31: 726-735.  
482 2017/07/12. DOI: 10.1177/1545968317718269.
- 483 35. Bailey TG, Perissiou M, Windsor M, et al. Cardiorespiratory fitness modulates the acute flow-  
484 mediated dilation response following high-intensity but not moderate-intensity exercise in elderly men.  
485 *J Appl Physiol (1985)* 2017; 122: 1238-1248. 2017/02/18. DOI: 10.1152/jappphysiol.00935.2016.
- 486 36. Bailey TG, Perissiou M, Windsor MT, et al. Effects of acute exercise on endothelial function in  
487 patients with abdominal aortic aneurysm. *Am J Physiol Heart Circ Physiol* 2018; 314: H19-H30.  
488 2017/09/25. DOI: 10.1152/ajpheart.00344.2017.
- 489 37. Windsor MT, Bailey TG, Perissiou M, et al. Cytokine Responses to Acute Exercise in Healthy  
490 Older Adults: The Effect of Cardiorespiratory Fitness. *Front Physiol* 2018; 9: 203. 2018/03/31. DOI:  
491 10.3389/fphys.2018.00203.
- 492 38. Billinger SA, Craig JC, Kwapiszeski SJ, et al. Dynamics of middle cerebral artery blood flow  
493 velocity during moderate-intensity exercise. *J Appl Physiol (1985)* 2017; 122: 1125-1133. 2017/03/11.  
494 DOI: 10.1152/jappphysiol.00995.2016.
- 495 39. Addicott MA, Yang LL, Peiffer AM, et al. The effect of daily caffeine use on cerebral blood flow:  
496 How much caffeine can we tolerate? *Hum Brain Mapp* 2009; 30: 3102-3114. 2009/02/17. DOI:  
497 10.1002/hbm.20732.
- 498 40. Marley CJ, Hodson D, Brugniaux JV, et al. Post-prandial hyperlipidaemia results in systemic  
499 nitrosative stress and impaired cerebrovascular function in the aged. *Clin Sci (Lond)* 2017; 131: 2807-  
500 2812. 2017/10/22. DOI: 10.1042/cs20171406.
- 501 41. Mathew RJ and Wilson WH. Regional cerebral blood flow changes associated with ethanol  
502 intoxication. *Stroke* 1986; 17: 1156-1159. 1986/11/01. DOI: 10.1161/01.str.17.6.1156.
- 503 42. Whitaker AA, Vidoni ED, Aaron SE, et al. Novel application of a force sensor during sit-to-stands  
504 to measure dynamic cerebral autoregulation onset. *Physiol Rep* 2022; 10: e15244. 2022/04/07. DOI:  
505 10.14814/phy2.15244.
- 506 43. Labrecque L, Rahimaly K, Imhoff S, et al. Dynamic cerebral autoregulation is attenuated in young  
507 fit women. *Physiol Rep* 2019; 7: e13984. 2019/01/18. DOI: 10.14814/phy2.13984.
- 508 44. Freeman R, Wieling W, Axelrod FB, et al. Consensus statement on the definition of orthostatic  
509 hypotension, neurally mediated syncope and the postural tachycardia syndrome. *Clin Auton Res* 2011;  
510 21: 69-72. DOI: 10.1007/s10286-011-0119-5.
- 511 45. Wieling W, Krediet CT, van Dijk N, et al. Initial orthostatic hypotension: review of a forgotten  
512 condition. *Clin Sci (Lond)* 2007; 112: 157-165. DOI: 10.1042/cs20060091.
- 513 46. Perry BG, Cotter JD, Mejuto G, et al. Cerebral hemodynamics during graded Valsalva maneuvers.  
514 *Front Physiol* 2014; 5: 349. 2014/10/14. DOI: 10.3389/fphys.2014.00349.
- 515 47. Panerai RB, Brassard P, Burma JS, et al. Transfer function analysis of dynamic cerebral  
516 autoregulation: A CARNet white paper 2022 update. *J Cereb Blood Flow Metab* 2023; 43: 3-25.  
517 2022/08/14. DOI: 10.1177/0271678X221119760.
- 518 48. Claassen JA, Meel-van den Abeelen AS, Simpson DM, et al. Transfer function analysis of dynamic  
519 cerebral autoregulation: A white paper from the International Cerebral Autoregulation Research  
520 Network. *J Cereb Blood Flow Metab* 2016; 36: 665-680. 2016/01/20. DOI: 10.1177/0271678X15626425.

- 521 49. Kwong PWH and Ng SSM. Cutoff Score of the Lower-Extremity Motor Subscale of Fugl-Meyer  
522 Assessment in Chronic Stroke Survivors: A Cross-Sectional Study. *Arch Phys Med Rehabil* 2019; 100:  
523 1782-1787. 20190320. DOI: 10.1016/j.apmr.2019.01.027.
- 524 50. Chertoff ME, Billinger SA, Perdomo SJ, et al. A Novel Nonlinear System Identification for Cerebral  
525 Autoregulation in Human: Computer Simulation and Validation. *Ann Biomed Eng* 2020; 48: 1207-1217.  
526 20191223. DOI: 10.1007/s10439-019-02442-7.
- 527 51. Freeman R, Wieling W, Axelrod FB, et al. Consensus statement on the definition of orthostatic  
528 hypotension, neurally mediated syncope and the postural tachycardia syndrome. *Auton Neurosci* 2011;  
529 161: 46-48. 2011/03/12. DOI: 10.1016/j.autneu.2011.02.004.
- 530 52. Intharakham K, Beishon L, Panerai RB, et al. Assessment of cerebral autoregulation in stroke: A  
531 systematic review and meta-analysis of studies at rest. *J Cereb Blood Flow Metab* 2019; 39: 2105-2116.  
532 2019/08/23. DOI: 10.1177/0271678x19871013.
- 533 53. Bernhardt J, Hayward KS, Kwakkel G, et al. Agreed definitions and a shared vision for new  
534 standards in stroke recovery research: The Stroke Recovery and Rehabilitation Roundtable taskforce.  
535 *International Journal of Stroke* 2017; 12: 444-450. DOI: 10.1177/1747493017711816.
- 536 54. Aries MJH, Elting JW, Keyser JD, et al. Cerebral Autoregulation in Stroke. *Stroke* 2010; 41: 2697-  
537 2704. DOI: doi:10.1161/STROKEAHA.110.594168.
- 538 55. Beishon LC and Minhas JS. Cerebral Autoregulation and Neurovascular Coupling in Acute and  
539 Chronic Stroke. *Front Neurol* 2021; 12: 720770. 2021/09/21. DOI: 10.3389/fneur.2021.720770.
- 540 56. Guo ZN, Xing Y, Wang S, et al. Characteristics of dynamic cerebral autoregulation in cerebral  
541 small vessel disease: Diffuse and sustained. *Sci Rep* 2015; 5: 15269. 2015/10/16. DOI:  
542 10.1038/srep15269.
- 543 57. Silverman A and Petersen NH. Physiology, Cerebral Autoregulation. *StatPearls*. Treasure Island  
544 (FL), 2022.
- 545 58. Roy M-A, Labrecque L, Perry BG, et al. Directional sensitivity of the cerebral pressure-flow  
546 relationship in young healthy individuals trained in endurance and resistance exercise. *Experimental*  
547 *Physiology* 2022; 107: 299-311. DOI: <https://doi.org/10.1113/EP090159>.
- 548 59. Labrecque L, Smirl JD and Brassard P. Utilization of the repeated squat-stand model for studying  
549 the directional sensitivity of the cerebral pressure-flow relationship. *J Appl Physiol (1985)* 2021; 131:  
550 927-936. 2021/07/16. DOI: 10.1152/jappphysiol.00269.2021.
- 551 60. Brassard P, Ferland-Dutil H, Smirl JD, et al. Evidence for hysteresis in the cerebral pressure-flow  
552 relationship in healthy men. *Am J Physiol Heart Circ Physiol* 2017; 312: H701-h704. 2017/01/29. DOI:  
553 10.1152/ajpheart.00790.2016.
- 554 61. Abbariki F, Roy MA, Labrecque L, et al. Influence of high-intensity interval training to exhaustion  
555 on the directional sensitivity of the cerebral pressure-flow relationship in young endurance-trained men.  
556 *Physiol Rep* 2022; 10: e15384. 2022/07/14. DOI: 10.14814/phy2.15384.
- 557 62. Meyer JS, Okamoto S, Sari A, et al. Effects of beta-adrenergic blockade on cerebral  
558 autoregulation and chemical vasomotor control in patients with stroke. *Stroke* 1974; 5: 167-179.  
559 1974/03/01. DOI: 10.1161/01.str.5.2.167.
- 560 63. Höllerhage HG, Gaab MR, Zumkeller M, et al. The influence of nimodipine on cerebral blood flow  
561 autoregulation and blood-brain barrier. *J Neurosurg* 1988; 69: 919-922. 1988/12/01. DOI:  
562 10.3171/jns.1988.69.6.0919.
- 563 64. Aihara K. Effects of nitrendipine on the autoregulation of regional cerebral blood flow in the  
564 pithed rabbit. *Naunyn-Schmiedeberg's archives of pharmacology* 1989; 339: 469-473. 1989/04/01. DOI:  
565 10.1007/bf00736063.
- 566 65. Asano N, Hishiyama S, Ishiyama T, et al. Effects of beta(1)-adrenergic receptor blockade on the  
567 cerebral microcirculation in the normal state and during global brain ischemia/reperfusion injury in  
568 rabbits. *BMC Pharmacol Toxicol* 2020; 21: 13. 2020/02/23. DOI: 10.1186/s40360-020-0394-7.

- 569 66. Moir ME, Klassen SA, Zamir M, et al. Rapid changes in vascular compliance contribute to  
570 cerebrovascular adjustments during transient reductions in blood pressure in young, healthy adults. *J*  
571 *Appl Physiol (1985)* 2020; 129: 27-35. 2020/05/29. DOI: 10.1152/jappphysiol.00272.2020.
- 572 67. Meng L and Gelb AW. Regulation of Cerebral Autoregulation by Carbon Dioxide. *Anesthesiology*  
573 2015; 122: 196-205. DOI: 10.1097/aln.0000000000000506.
- 574 68. Moralez G, Romero SA, Rickards CA, et al. Effects of dehydration on cerebrovascular control  
575 during standing after heavy resistance exercise. *Journal of Applied Physiology* 2012; 112: 1875-1883.  
576 DOI: 10.1152/jappphysiol.01217.2011.
- 577 69. Miller KB, Howery AJ, Rivera-Rivera LA, et al. Age-Related Reductions in Cerebrovascular  
578 Reactivity Using 4D Flow MRI. *Frontiers in aging neuroscience* 2019; 11: 281. 2019/11/05. DOI:  
579 10.3389/fnagi.2019.00281.
- 580 70. Tzeng YC, Willie CK, Atkinson G, et al. Cerebrovascular regulation during transient hypotension  
581 and hypertension in humans. *Hypertension* 2010; 56: 268-273. 2010/06/16. DOI:  
582 10.1161/HYPERTENSIONAHA.110.152066.
- 583 71. Labrecque L, Burma JS, Roy MA, et al. Reproducibility and diurnal variation of the directional  
584 sensitivity of the cerebral pressure-flow relationship in men and women. *J Appl Physiol (1985)* 2022;  
585 132: 154-166. 2021/12/03. DOI: 10.1152/jappphysiol.00653.2021.

586

587 **Figure Legend**

588 **Figure 1. Protocol Measuring Dynamic Cerebral Autoregulation after an Acute Bout of**

589 **HIIT.** TFA = transfer function analysis (was conducted during seated rest). BL = baseline. R =

590 active recovery. H = high-intensity. Post = Recovery immediately following HIIT. Post30 =

591 Recovery at 30 min after HIIT.

592 **Figure 2. Flow Diagram.**

593 **Figure 3. Transfer Function Analysis in Individual Post-Stroke compared to CON**

594 **following HIIT.** Solid black line = individuals with chronic stroke. Dotted Line = age- and sex-

595 matched adult controls (CON). Hz = hertz.

596 **Figure 4. Baseline Sit-to-Stand Measure of Dynamic Cerebral Autoregulation.**

597 Mean and standard deviation lines. Individuals post-stroke (n = 22) = Grey line. Age- and sex-

598 matched controls (CON, n = 23) = Black line. CVCi = cerebrovascular conductance index

599 (MCAv/MAP). Horizontal black line = marks the moment of arise-and-off (AO) detected by the

600 custom force sensor as the moment individuals stood up. Arrow = Time delay (TD) of the

601 regulation response before an increase in CVCi. Square box = slope of the rate of regulation

602 (ROR). Resampled to 1 Hz for group averages.



603

604 **Table 1. Participant Characteristics**

|                                        | <b>Individuals<br/>Post-Stroke<br/>(n = 22)</b> | <b>CON<br/>(n = 24)</b> | <b>p-value</b>    |
|----------------------------------------|-------------------------------------------------|-------------------------|-------------------|
| <b>Age<sup>†</sup> (years)</b>         | 60 ± 12                                         | 60 ± 13                 | 0.80              |
| <b>Female n (%)</b>                    | 9 (41%)                                         | 8 (33%)                 | 0.76              |
| <b>BMI (kg/m<sup>2</sup>)</b>          | 30.7 ± 6.0                                      | 28.9 ± 6.6              | 0.34              |
| <b>Race n (%)</b>                      |                                                 |                         | 0.34              |
| Asian                                  | 0                                               | 1 (4%)                  |                   |
| Black/African American                 | 4 (18%)                                         | 2 (8%)                  |                   |
| White/Caucasian                        | 17 (77%)                                        | 21 (88%)                |                   |
| White & Native American                | 1 (5%)                                          | 0                       |                   |
| <b>Blood Pressure Medications</b>      |                                                 |                         |                   |
| Beta Blocker                           | 9 (41%)                                         | 1 (4%)                  | <b>0.004*</b>     |
| ACE Inhibitor                          | 6 (27%)                                         | 2 (8%)                  | 0.13              |
| Angiotensin II Receptor<br>Blocker     | 6 (27%)                                         | 5 (21%)                 | 0.73              |
| Calcium Channel Blocker                | 8 (36%)                                         | 3 (13%)                 | 0.09              |
| Diuretic                               | 2 (9%)                                          | 3 (13%)                 | 1.00              |
| Vasodilator                            | 1 (5%)                                          | 0                       | 0.48              |
| <b>5x Sit-to-Stand<sup>†</sup> (s)</b> | 21.9 ± 13.5                                     | 8.6 ± 2.7               | <b>&lt;0.001*</b> |

|                                                                                                               |                |                 |                   |
|---------------------------------------------------------------------------------------------------------------|----------------|-----------------|-------------------|
| <b>TBRS estimated <math>\dot{V}O_{2\max}</math></b><br>( $\text{ml}\cdot\text{kg}^{-1}\cdot\text{min}^{-1}$ ) | $29.2 \pm 9.4$ | $32.3 \pm 10.2$ | 0.30              |
| <b>Workload during High Intensity<sup>†</sup></b><br>(Watts)                                                  | $79 \pm 27$    | $117 \pm 36$    | <b>&lt;0.001*</b> |
| <b>Workload during Active Recovery<sup>†</sup></b><br>(Watts)                                                 | $16 \pm 2$     | $18 \pm 4$      | <b>0.04*</b>      |

---

### Stroke Characteristics

|                                         |             |
|-----------------------------------------|-------------|
| <b>Months Post-Stroke</b>               | $31 \pm 16$ |
| <b>Right-Sided Stroke n (%)</b>         | 11 (50%)    |
| <b>Ischemic Stroke n (%)</b>            | 18 (82%)    |
| <b>MCA Stroke n (%)</b>                 | 12 (55%)    |
| <b>mRS n (%)</b>                        |             |
| No Significant Disability (1)           | 9 (41%)     |
| Slight Disability (2)                   | 6 (27%)     |
| Moderate Disability (3)                 | 7 (32%)     |
| <b>Fugl-Meyer Lower Extremity Score</b> | $23 \pm 6$  |

---

Means (Standard Deviations). \*Significantly different between groups. † = Non-normally distributed. BMI = body mass index. TBRS = Total Body Recumbent Stepper Submaximal Exercise Test.  $\dot{V}O_{2\max}$  = maximal oxygen consumption.  $\text{ml}\cdot\text{kg}^{-1}\cdot\text{min}^{-1}$  = milliliters of oxygen per kilogram of body weight per minute. estimatedWatt<sub>max</sub> = estimated maximal watts. mRS = modified rankin scale. MOCA = montreal cognitive assessment.

---

605 **Table 2. Transfer Function Analysis of Spontaneous Fluctuations at Rest**

|                                                   | Individuals Post-Stroke<br>(n = 8) |                           |                      | CON<br>(n = 14) |                           |                             | Group | Time              | Interaction  |
|---------------------------------------------------|------------------------------------|---------------------------|----------------------|-----------------|---------------------------|-----------------------------|-------|-------------------|--------------|
|                                                   | BL                                 | Immediately<br>after HIIT | 30 min<br>after HIIT | BL              | Immediately<br>after HIIT | 30 min<br>after HIIT        |       |                   |              |
| MCAv (cm/s)                                       | 47 ± 5                             | 45 ± 5                    | 47 ± 6               | 48 ± 10         | 47 ± 8                    | 50 ± 11 <sup>^</sup>        | 0.20  | <b>0.003*</b>     | 0.73         |
| MAP (mmHg)                                        | 75 ± 12                            | 70 ± 6                    | 73 ± 7               | 81 ± 11         | 77 ± 9 <sup>^</sup>       | 82 ± 11                     | 0.06  | <b>0.02*</b>      | 0.74         |
| P <sub>ET</sub> CO <sub>2</sub>                   | 37 ± 5                             | 36 ± 5                    | 35 ± 5 <sup>^</sup>  | 36 ± 3          | 35 ± 3                    | 34 ± 3 <sup>^</sup>         | 0.53  | <b>&lt;0.001*</b> | 0.90         |
| <b><u>Very Low Frequency (0.02 – 0.07 Hz)</u></b> |                                    |                           |                      |                 |                           |                             |       |                   |              |
| MAP PSD<br>(mmHg <sup>2</sup> )                   | 5.58 ± 3.99                        | 3.71 ± 1.68               | 6.46 ± 2.94          | 4.49 ± 2.28     | 4.97 ± 2.67               | 5.47 ± 2.21                 | 0.72  | 0.11              | 0.23         |
| MCAv PSD<br>(cm/s <sup>2</sup> )                  | 2.93 ± 1.75                        | 3.13 ± 1.64               | 3.99 ± 1.63          | 3.60 ± 5.09     | 2.73 ± 2.50               | 3.04 ± 3.19                 | 0.86  | 0.43              | 0.23         |
| Coherence                                         | 0.62 ± 0.17                        | 0.55 ± 0.09               | 0.67 ± 0.18          | 0.58 ± 0.14     | 0.52 ± 0.13               | 0.55 ± 0.18                 | 0.26  | 0.12              | 0.33         |
| Gain<br>(cm/s/mmHg)                               | 0.66 ± 0.31                        | 0.74 ± 0.25               | 0.73 ± 0.32          | 0.71 ± 0.34     | 0.62 ± 0.29 <sup>^</sup>  | 0.56 ±<br>0.24 <sup>^</sup> | 0.53  | 0.51              | <b>0.02*</b> |
| Normalized Gain                                   | 1.38 ± 0.54                        | 1.65 ± 0.58               | 1.52 ± 0.62          | 1.44 ± 0.42     | 1.30 ± 0.40 <sup>^</sup>  | 1.11 ±                      | 0.23  | 0.14              | <b>0.01*</b> |

|                                             |             |                          |             |             |                          |                   |              |              |      |
|---------------------------------------------|-------------|--------------------------|-------------|-------------|--------------------------|-------------------|--------------|--------------|------|
| (%/mmHg)                                    |             |                          |             |             |                          | 0.36 <sup>^</sup> |              |              |      |
| Phase (degrees)                             | 49.7 ± 14.8 | 43.3 ± 20.9 <sup>†</sup> | 44.1 ± 18.1 | 59.9 ± 14.8 | 65.8 ± 18.5 <sup>†</sup> | 55.8 ± 15.2       | <b>0.03*</b> | 0.31         | 0.17 |
| <b><u>Low Frequency (0.07 – 0.2 Hz)</u></b> |             |                          |             |             |                          |                   |              |              |      |
| MAP PSD                                     | 2.61 ± 2.10 | 2.36 ± 2.79              | 3.36 ± 3.37 | 2.28 ± 2.33 | 3.91 ± 4.04              | 3.70 ± 3.72       | 0.67         | 0.26         | 0.36 |
| (mmHg <sup>2</sup> )                        |             |                          |             |             |                          |                   |              |              |      |
| MCAv PSD                                    | 2.37 ± 2.00 | 2.92 ± 4.32              | 2.93 ± 3.97 | 1.91 ± 1.92 | 3.18 ± 3.57              | 2.34 ± 2.47       | 0.83         | 0.25         | 0.62 |
| (cm/sec <sup>2</sup> )                      |             |                          |             |             |                          |                   |              |              |      |
| Coherence                                   | 0.75 ± 0.20 | 0.66 ± 0.20              | 0.76 ± 0.16 | 0.71 ± 0.18 | 0.73 ± 0.12              | 0.74 ± 0.17       | 0.96         | 0.32         | 0.35 |
| Gain                                        | 0.91 ± 0.27 | 0.97 ± 0.34              | 0.91 ± 0.32 | 0.88 ± 0.28 | 0.90 ± 0.22              | 0.83 ± 0.26       | 0.61         | 0.21         | 0.76 |
| (cm/s/mmHg)                                 |             |                          |             |             |                          |                   |              |              |      |
| Normalized Gain                             | 1.92 ± 0.42 | 2.12 ± 0.57              | 1.88 ± 0.52 | 1.85 ± 0.49 | 1.93 ± 0.39              | 1.64 ±            | 0.36         | <b>0.01*</b> | 0.55 |
| (%/mmHg)                                    |             |                          |             |             |                          | 0.35 <sup>^</sup> |              |              |      |
| Phase (degrees)                             | 25.8 ± 5.5  | 26.7 ± 7.7               | 30.4 ± 9.2  | 32.4 ± 9.7  | 33.5 ± 10.4              | 33.5 ± 9.3        | 0.10         | 0.40         | 0.63 |

---

Mean ± SD. \* Significantly different at p < 0.05. † Significantly different between groups (Used Mann-Whitney U test due to uneven groups). ^ Significantly different from BL. CON = age- and sex-matched adults. MCAv = middle cerebral artery blood velocity. MAP = mean arterial pressure. PSD = power spectral density. VLF = very low frequency. LF = low frequency. BL = baseline.

---



607

608 **Table 3. Sit-to-Stand Dynamic Cerebral Autoregulation Metrics**

|                                                         | Individuals Post-Stroke<br>(n = 22) |                     |                      | CON<br>(n = 23) |                     |                      | Group | Time              | Interaction |
|---------------------------------------------------------|-------------------------------------|---------------------|----------------------|-----------------|---------------------|----------------------|-------|-------------------|-------------|
|                                                         | BL                                  | Following<br>HIIT   | 35 min<br>after HIIT | BL              | Following<br>HIIT   | 35 min<br>after HIIT |       |                   |             |
| <b>Seated MCAv (cm/s)</b>                               | 42 ± 11                             | 42 ± 11             | 42 ± 11              | 50 ± 15         | 49 ± 14             | 49 ± 13              | 0.052 | 0.07              | 0.66        |
| <b>Seated MAP (mmHg)</b>                                | 84 ± 12                             | 82 ± 10             | 82 ± 8               | 82 ± 11         | 86 ± 11             | 85 ± 11              | 0.52  | 0.49              | 0.08        |
| <b>Seated P<sub>ET</sub>CO<sub>2</sub><br/>(mmHg)</b>   | 36 ± 5                              | 34 ± 6 <sup>^</sup> | 35 ± 4               | 36 ± 4          | 34 ± 4 <sup>^</sup> | 34 ± 4 <sup>^</sup>  | 0.71  | <b>&lt;0.001*</b> | 0.31        |
| <b>Standing MCAv<br/>(cm/s)</b>                         | 41 ± 11                             | 39 ± 11             | 41 ± 11              | 48 ± 14         | 47 ± 13             | 48 ± 13              | 0.60  | 0.001             | 0.53        |
| <b>Standing MAP<br/>(mmHg)</b>                          | 84 ± 14                             | 84 ± 14             | 84 ± 13              | 83 ± 13         | 85 ± 12             | 87 ± 12              | 0.74  | 0.32              | 0.26        |
| <b>Standing P<sub>ET</sub>CO<sub>2</sub><br/>(mmHg)</b> | 36 ± 4                              | 34 ± 4 <sup>^</sup> | 35 ± 4 <sup>^</sup>  | 35 ± 3          | 33 ± 4 <sup>^</sup> | 33 ± 4 <sup>^</sup>  | 0.27  | <b>&lt;0.001*</b> | 0.51        |
| <b>TD onset</b>                                         | 2.99 ± 2.05                         | 2.88 ±              | 2.66 ± 2.00          | 3.00 ±          | 2.83 ±              | 2.99 ± 2.77          | 0.83  | 0.90              | 0.87        |

|                     |             |         |             |         |         |             |      |      |      |
|---------------------|-------------|---------|-------------|---------|---------|-------------|------|------|------|
|                     |             | 1.97    |             | 2.14    | 1.86    |             |      |      |      |
| <b>ROR</b>          | 0.005 ±     | 0.026 ± | 0.005 ±     | 0.003 ± | 0.003 ± | 0.003 ±     | 0.11 | 0.21 | 0.21 |
|                     | 0.009       | 0.080   | 0.006       | 0.003   | 0.003   | 0.003       |      |      |      |
| <b>%ΔMCAv</b>       | 12.1% ±     | 16.9% ± | 14.9% ±     | 15.3% ± | 15.9% ± | 16.0% ±     | 0.66 | 0.17 | 0.32 |
|                     | 10.0%       | 8.2%    | 9.7%        | 10.1%   | 11.6%   | 10.1%       |      |      |      |
| <b>%ΔMAP</b>        | 16.5% ±     | 18.0% ± | 15.5% ±     | 18.7% ± | 19.8% ± | 18.5% ±     | 0.35 | 0.22 | 0.88 |
|                     | 8.5%        | 7.7%    | 9.9%        | 8.9%    | 10.8%   | 9.6%        |      |      |      |
| <b>%ΔMCAv/%ΔMAP</b> | 0.64 ± 0.61 | 1.06 ±  | 0.87 ± 1.13 | 0.77 ±  | 0.80 ±  | 0.85 ± 0.50 | 0.80 | 0.19 | 0.30 |
|                     |             | 1.12    |             | 0.47    | 0.63    |             |      |      |      |

Mean ± SD. \* Significantly different at  $p < 0.05$ . † Significantly different between groups. ^Significantly different than BL.

CON = age- and sex-matched adults. BL = baseline. TD = time delay. ROR = rate of regulation. %Δ = percent change from baseline to nadir upon standing. MCAv = middle cerebral artery blood velocity. MAP = mean arterial pressure.

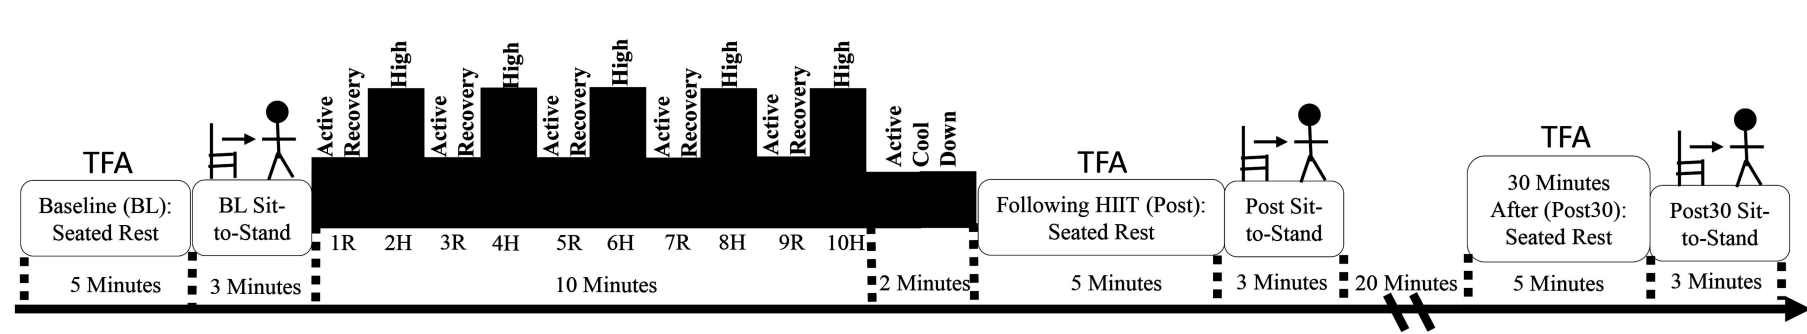



Participant Enrollment

Enrolled and Assessed for Eligibility  
(n = 60)

Excluded (n = 8)

- ◆ No TCD Signal on Left or Right Hemisphere (n = 5)
- ◆ Unable to perform HIIT due to weakness (n = 3)

Participant Testing

Completed Visit 1 Screening (n = 52)

- ◆ Older Adults (n = 26)
- ◆ Individuals with Stroke (n = 26)

Lost to Follow Up (n = 2)

- ◆ Older Adult (n = 1)
- ◆ Individual with Stroke (n = 1)

Completed Visit 2 Data Collection (n = 50)

- ◆ Older Adults (n = 25)
- ◆ Individuals with Stroke (n = 25)

Analysis

Excluded

- ◆ Noise in Signal (n = 4)

Data Included in Analysis (n = 46)

- ◆ Older Adults (n = 24)
- ◆ Individuals with Stroke (n = 22)

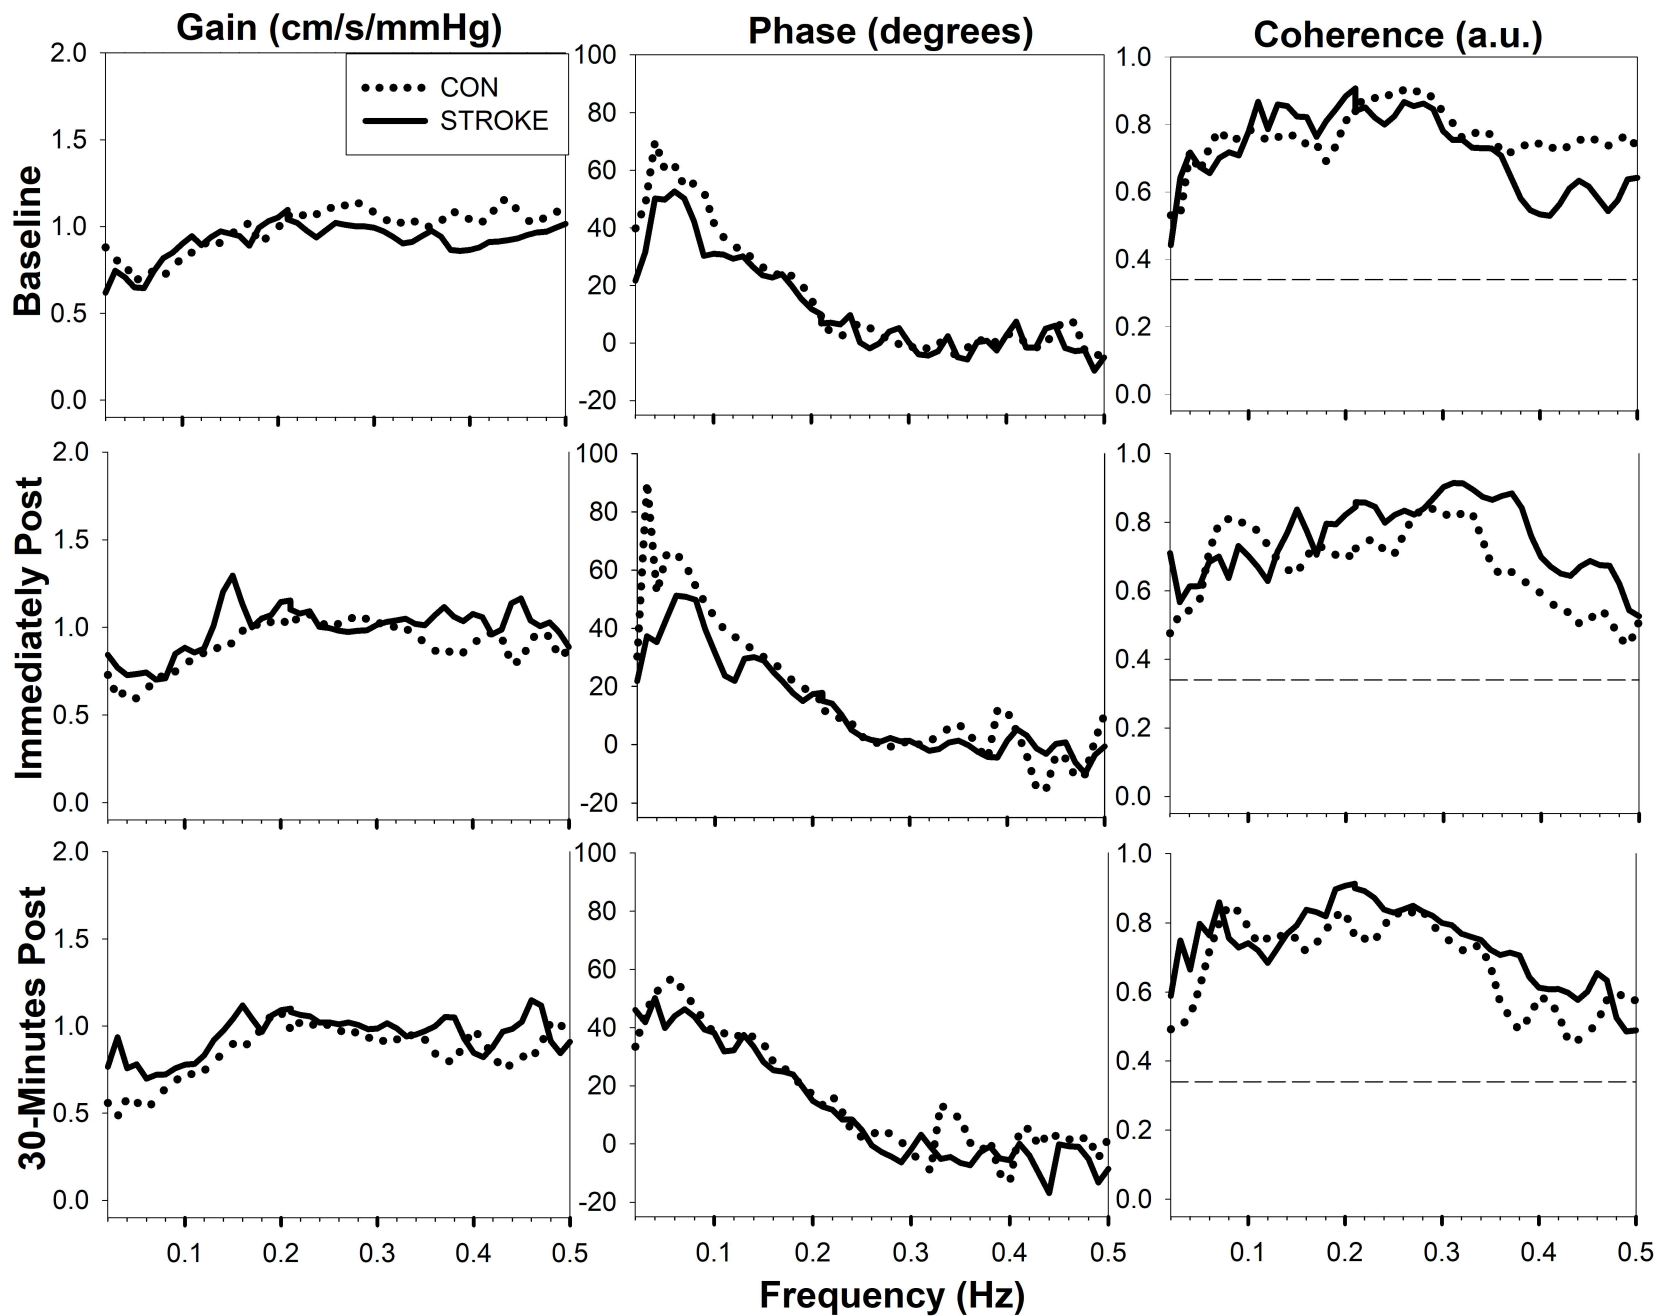

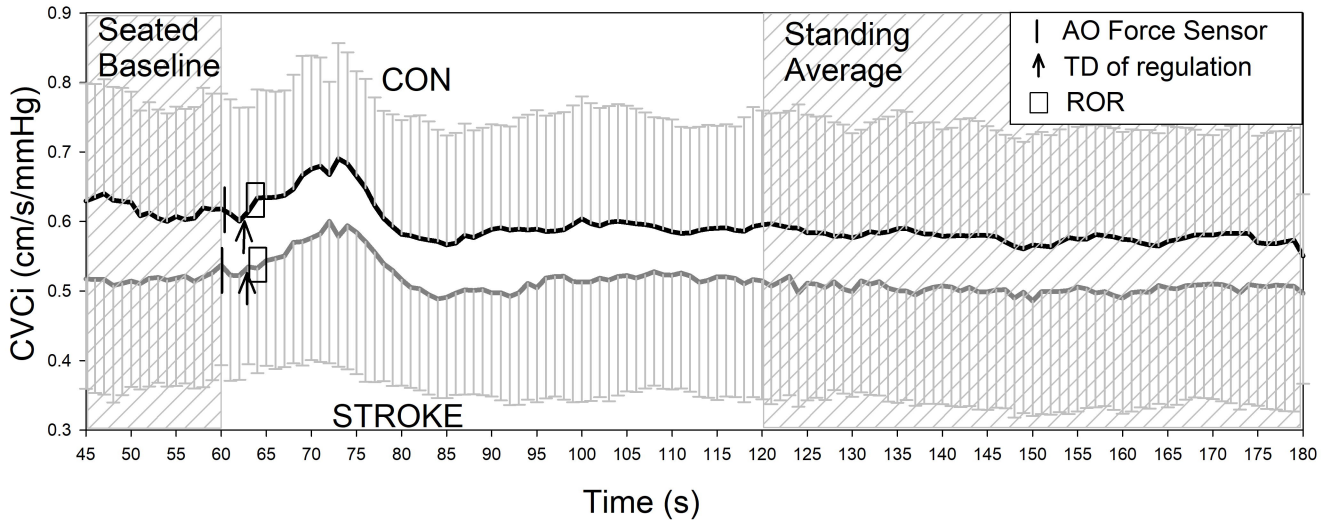

Source: https://medrxiv.org/content/medrxiv/early/2023/06/20/2023.06.13.23291289.full.pdf
